# Supplementary material for: Special adhesion of natural honeycomb walls and their application
Source: Royal Society of Chemistry journal article supplement (doi:10.1039/c4cp04615c), 2015-01-01
Supplement: c4cp04615c1.pdf [file c4cp04615c1.pdf]

## Supporting Information

# Special Adhesion of the Natural Honeycomb Walls and Their Application

Tianqi Guo,<sup>†</sup> Muchen Li,<sup>†</sup> Liping Heng,<sup>\*</sup> and Lei Jiang

School of Chemistry and Environment, Beihang University, 100191 China. Email:  
henglp@iccas.ac.cn.

<sup>†</sup> These authors contributed equally to this work

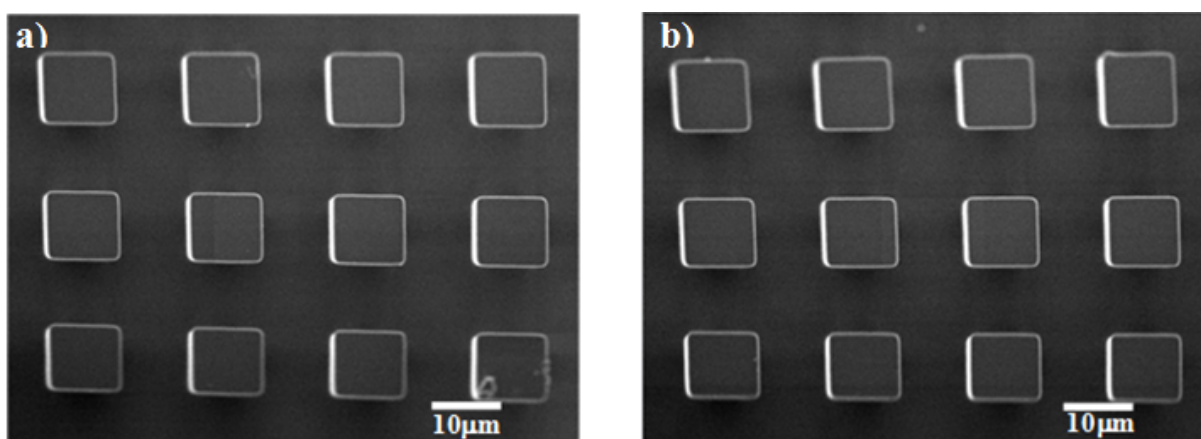

Figure S1. SEM images of the surface of the superhydrophobic (a) and superhydrophilic (b) square-pillar-structured silicon substrates.
